# Supplementary material
Source: PubMed Central journal article supplement (PMC4893171)

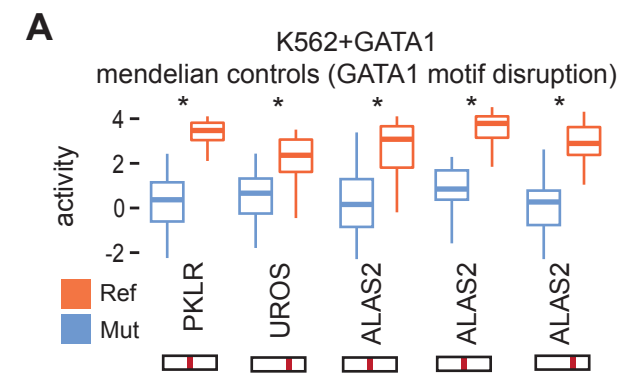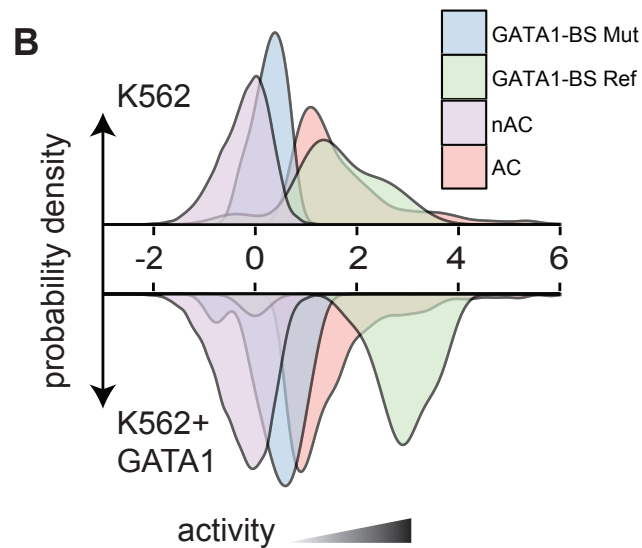

**C**

| K562   |        | K562+GATA1 |        |
|--------|--------|------------|--------|
| 6-mer  | Weight | 6-mer      | Weight |
| TTCCGG | 3.3    | GATAAG     | 3.4    |
| GATAAG | 3.1    | GGAGCT     | 3.0    |
| ATTGGT | 2.8    | GCCTGC     | 2.7    |
| TTCACG | 2.7    | GTGTCC     | 2.7    |
| CATGCT | 2.6    | GCTTGC     | 2.7    |
| TGTAAT | 2.6    | TCCTGG     | 2.6    |
| GTCCCT | 2.6    | GTCAGC     | 2.5    |
| GAACAG | 2.5    | GGCTTG     | 2.5    |
| TGACGT | 2.4    | TCACGC     | 2.5    |
| TGACTC | 2.4    | CTAGTG     | 2.4    |
| GCATGT | 2.3    | TGATAG     | 2.3    |
| CTTCCG | 2.3    | GATATG     | 2.3    |
| GGAAGG | 2.2    | GCTGAT     | 2.3    |
| CTGACG | 2.1    | TAGGCC     | 2.3    |
| GCGCCT | 2.1    | CGTTGG     | 2.3    |

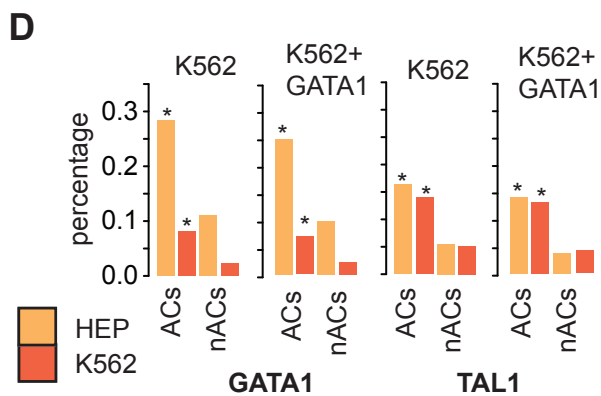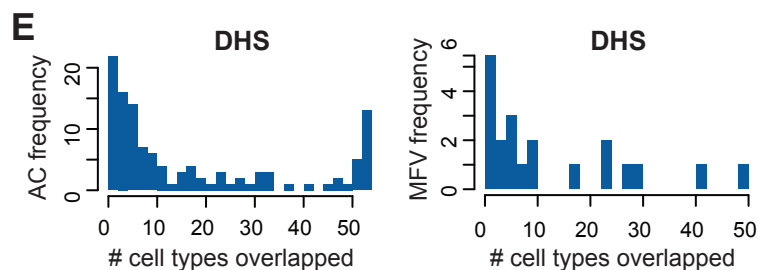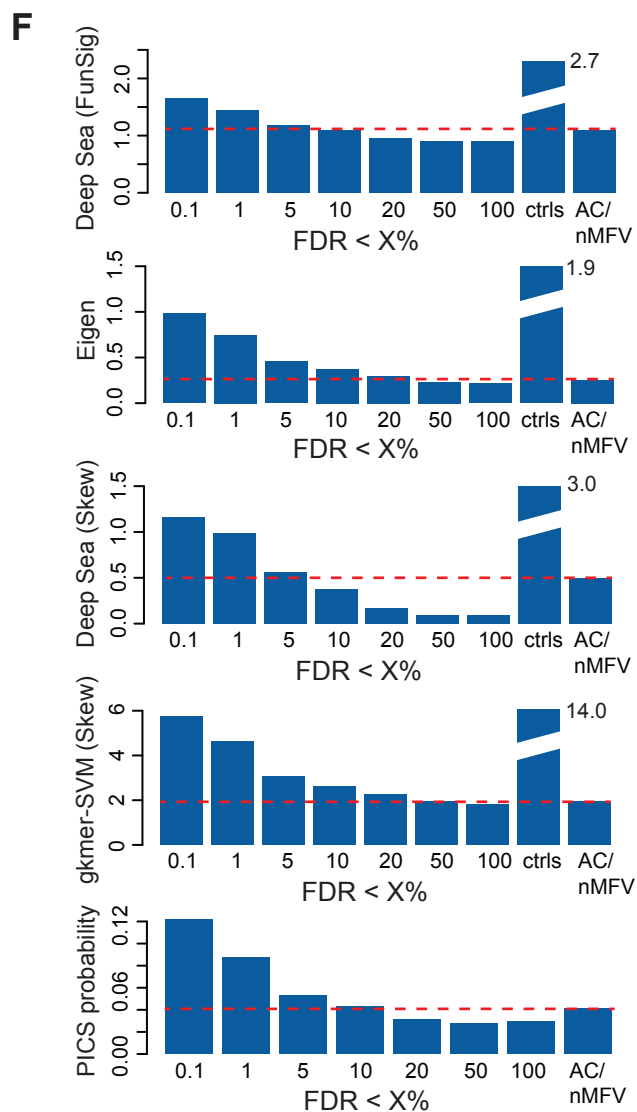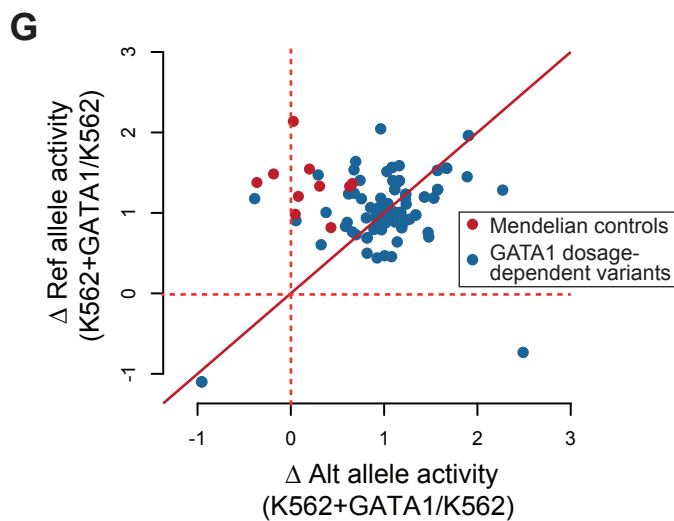

Supplement: NIHMS781700-supplement-3.pdf [file NIHMS781700-supplement-3.pdf]
