# Supplementary material
Source: PubMed Central journal article supplement (PMC4893171)
Supplement: NIHMS781700-supplement-4.pdf [file NIHMS781700-supplement-4.pdf]

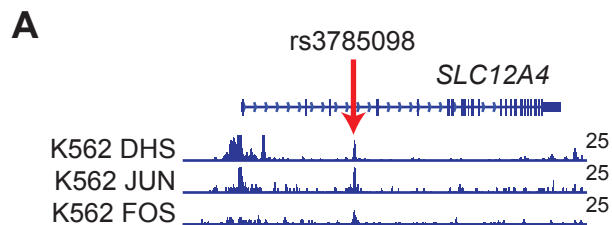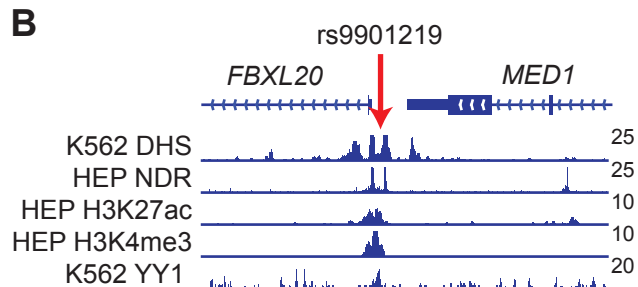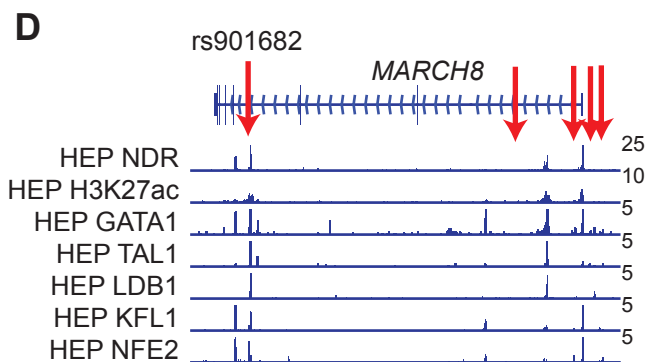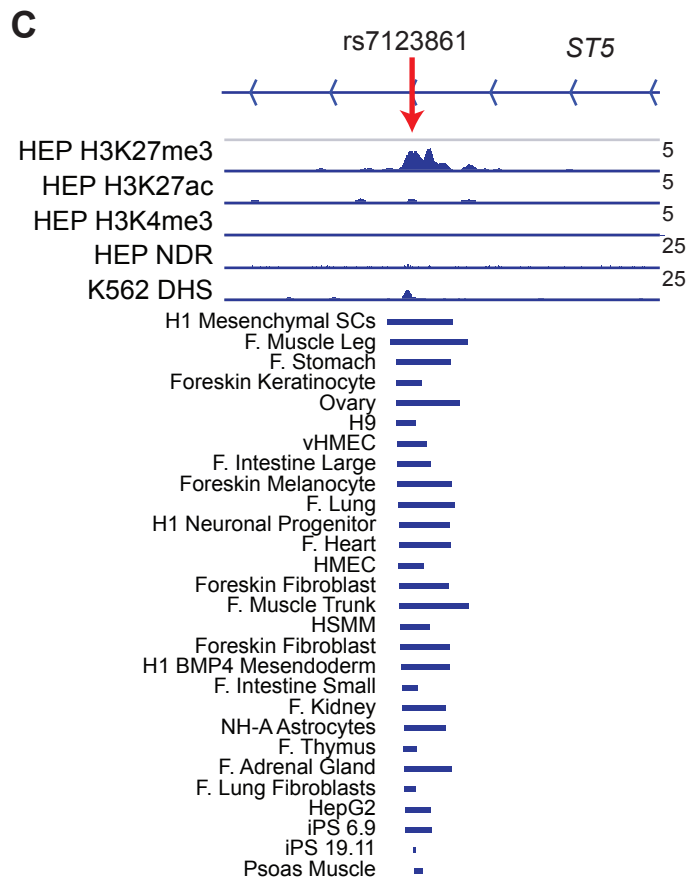

**E**

|               |     | rs3785098        | rs9901219 | rs7123861        | rs901682         |
|---------------|-----|------------------|-----------|------------------|------------------|
| allele        | Ref | T                | T         | G                | C                |
|               | Alt | C                | G         | A                | T                |
| MPRA activity | Ref | 2.61             | -0.72     | 1.39*            | 2.91*            |
|               | Alt | 4.35*            | 0.44*     | 0.17             | 2.12             |
| DHS reads     | Ref | 316              | 440       | 460 <sup>†</sup> | 165 <sup>†</sup> |
|               | Alt | 391 <sup>†</sup> | 486       | 371              | 107              |

\*MPRA skew (FDR < 1%)

<sup>†</sup>DHS skew (FDR < 5%)
