# Supplementary material
Source: PubMed Central journal article supplement (PMC4893171)
Supplement: NIHMS781700-supplement-5.pdf [file NIHMS781700-supplement-5.pdf]

**A**

rs737092

  
**K562** GCCGATAAGTG**C**CTGGCTCTGCT  
**D1** GCC-----TGGCTCTGCT  
**D2** GCC-----<sup>-8</sup>  
GCCGATAAG-----<sup>-19</sup>

**B**

rs117550

  
**K562** CTGCAGCCTAG**G**TTGGGCCACAAT  
**D3** CTGCAGCC-----ACAAT  
**D4** CTG-----CAAT  
**D5** CTGCA-----ACAAT

**C**

rs1546723

  
**K562** ACCTTATCTGTGGGAG**A**AGAGTGGGG  
**D6** ACCTTATCTGTGGG-----G  
**D7** A-----GTGGGG
