# Supplementary material
Source: PubMed Central journal article supplement (PMC4893171)

**A**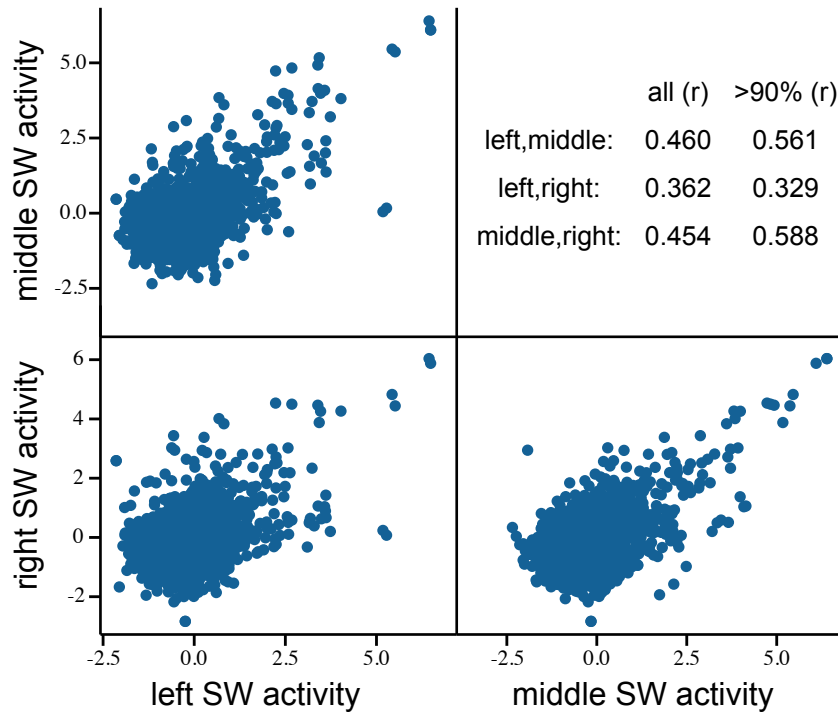**B**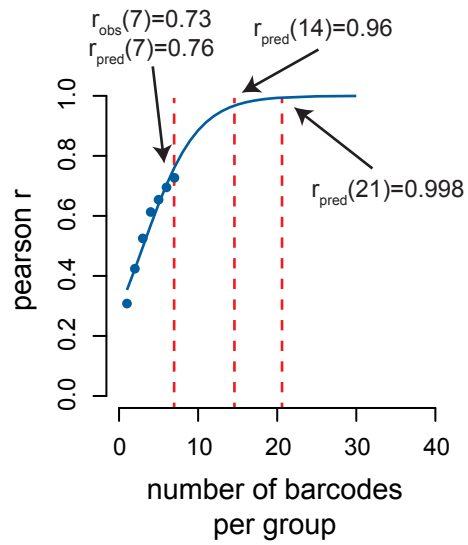

Supplement: NIHMS781700-supplement-1.pdf [file NIHMS781700-supplement-1.pdf]

**A**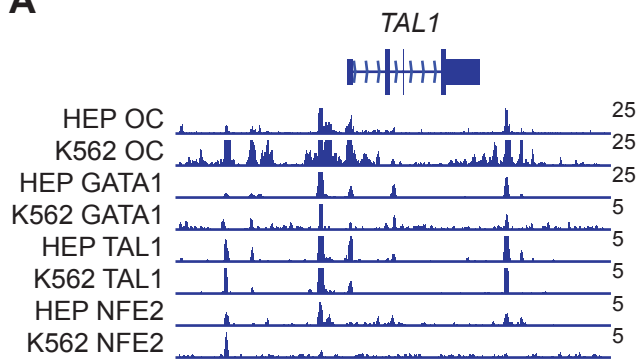**B**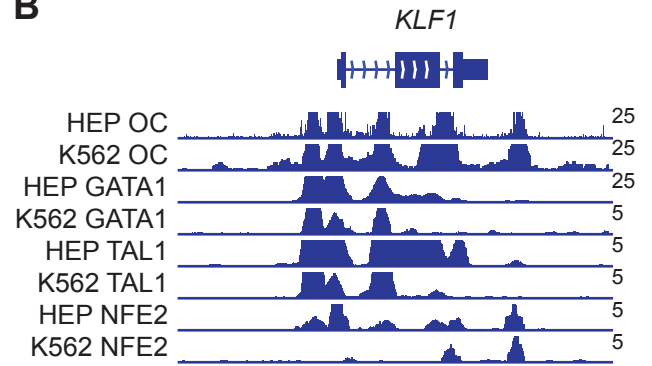**C**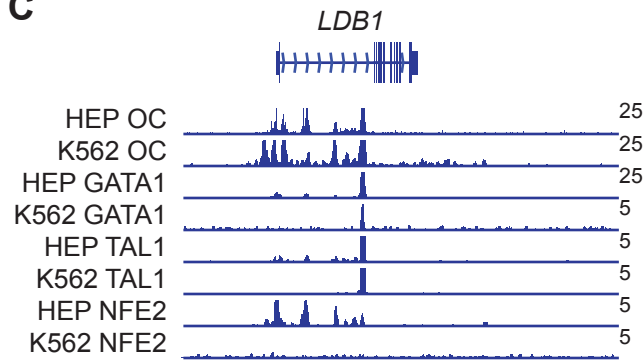**D**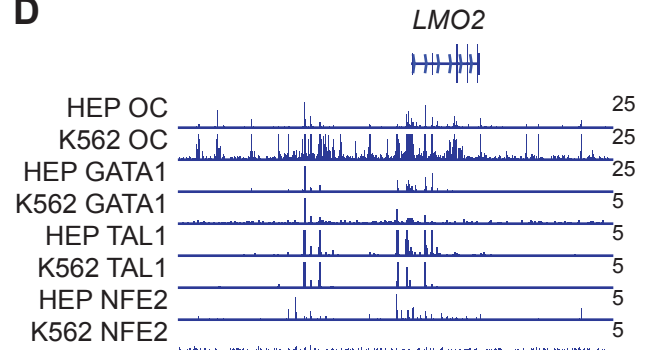**E**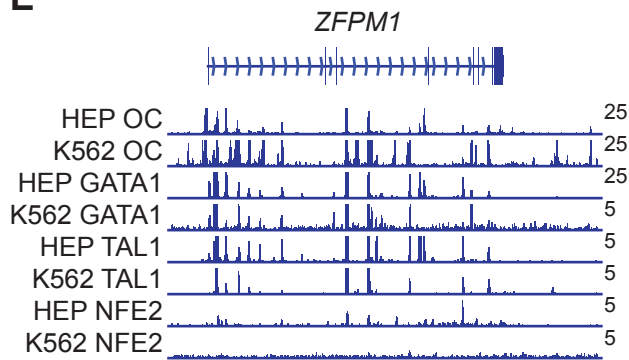**F**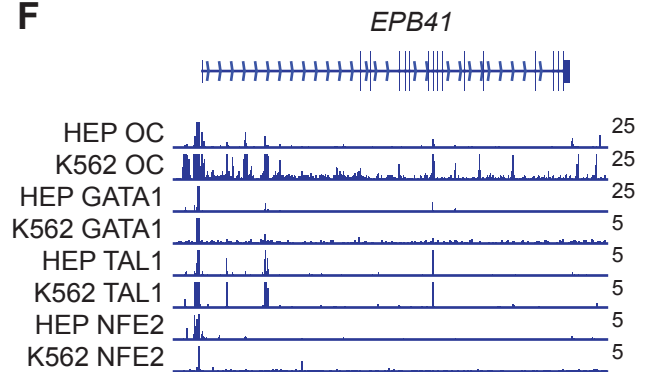**G**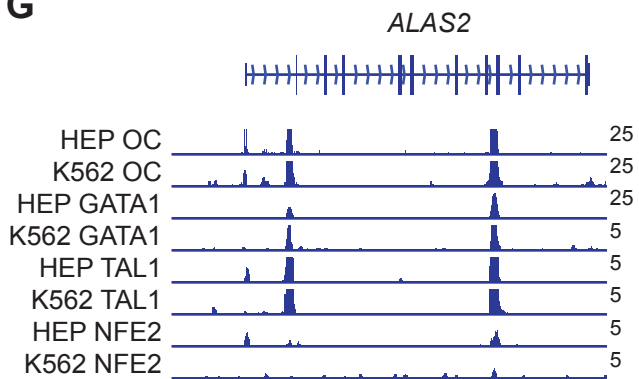**H**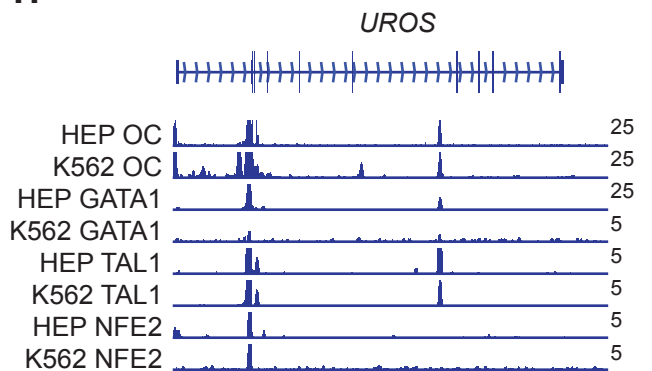

Supplement: NIHMS781700-supplement-2.pdf [file NIHMS781700-supplement-2.pdf]

**A**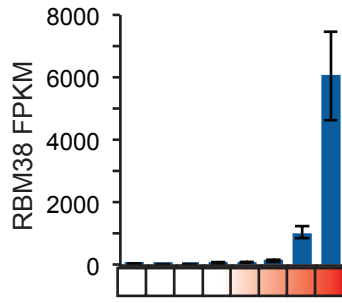**B**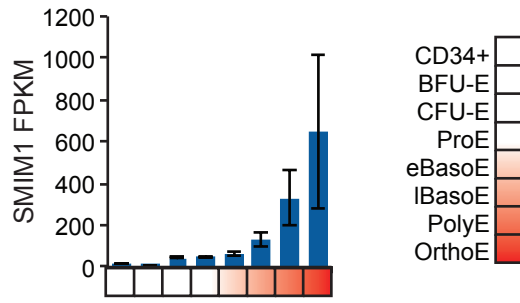**C**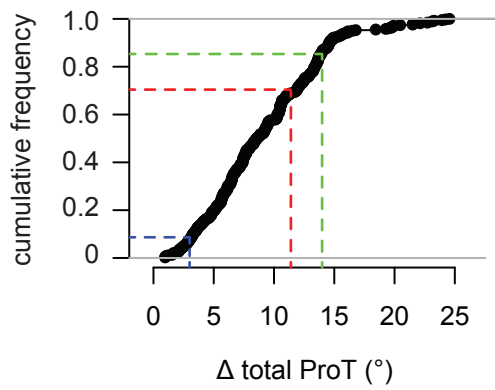**D**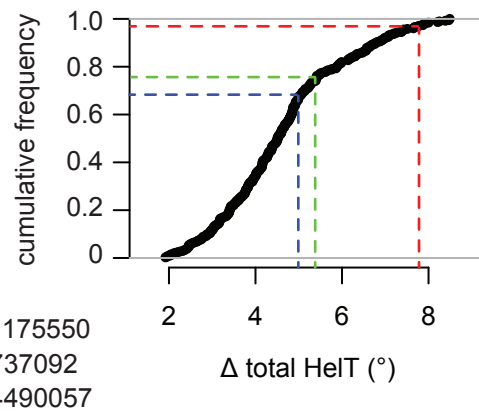

Supplement: NIHMS781700-supplement-6.pdf [file NIHMS781700-supplement-6.pdf]

**A**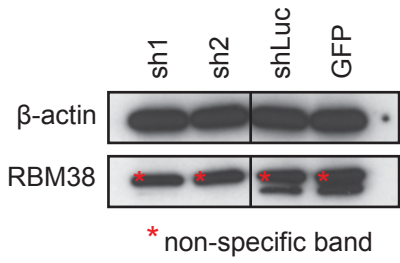**B**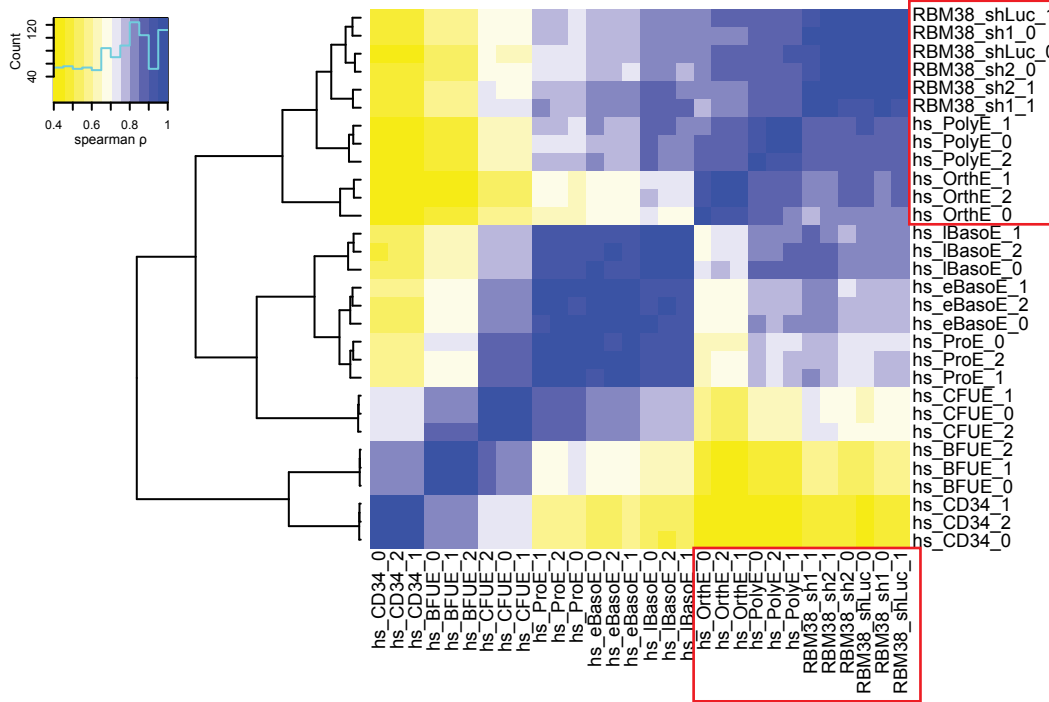**C**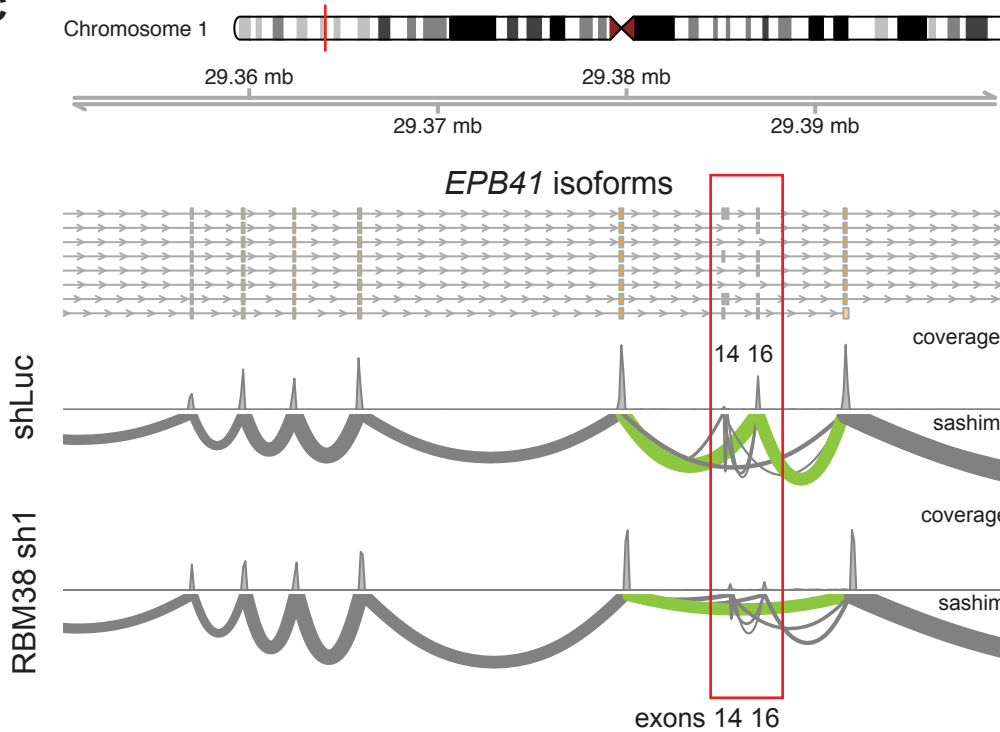

Supplement: NIHMS781700-supplement-7.pdf [file NIHMS781700-supplement-7.pdf]
